# Supplementary material for: Deregulation of Trace Amine-Associated Receptors (TAAR) Expression and Signaling Mode in Melanoma
Source: MDPI journal article supplement (doi:10.3390/biom12010114), 2022-01-11
Supplement: s1 [file s1]

**Table S1: GEO datasets included in the review.**

| GSE identifier                                                                       | Authors                                                   | Title                                                                                                                                                                                            | Structure                                             | Platform                                   | Link                                                                                                                                    |
|--------------------------------------------------------------------------------------|-----------------------------------------------------------|--------------------------------------------------------------------------------------------------------------------------------------------------------------------------------------------------|-------------------------------------------------------|--------------------------------------------|-----------------------------------------------------------------------------------------------------------------------------------------|
| <a href="https://www.ncbi.nlm.nih.gov/geo/query/acc.cgi?acc=GSE100797">GSE100797</a> | Lauss M, Jönsson G                                        | Mutational and neoantigen load predict clinical benefit of adoptive T cell therapy in melanoma                                                                                                   | 25 melanoma samples                                   | Illumina HiSeq 2000                        | <a href="https://www.ncbi.nlm.nih.gov/geo/query/acc.cgi?acc=GSE100797">https://www.ncbi.nlm.nih.gov/geo/query/acc.cgi?acc=GSE100797</a> |
| <a href="https://www.ncbi.nlm.nih.gov/geo/query/acc.cgi?acc=GSE131521">GSE131521</a> | Xu M, Sengupta S, Krummel D, Khan M                       | Radiation enhances melanoma response to immunotherapeutic and synergizes with benzodiazepines to promote improved anti-tumor activity                                                            | 17 brain metastases                                   | Illumina HiSeq 2500                        | <a href="https://www.ncbi.nlm.nih.gov/geo/query/acc.cgi?acc=GSE131521">https://www.ncbi.nlm.nih.gov/geo/query/acc.cgi?acc=GSE131521</a> |
| <a href="https://www.ncbi.nlm.nih.gov/geo/query/acc.cgi?acc=GSE133713">GSE133713</a> | Khan J, Wei JS                                            | Immune Signatures and Tumor Biomarkers from Whole Transcriptome Sequencing Predict Outcome in Recurrent Resectable Stage III and IV Melanoma when Evaluated Following Treatment with Hu14.18-IL2 | 13 pre-treatment and 10 post-treatment samples        | Illumina NextSeq 500                       | <a href="https://www.ncbi.nlm.nih.gov/geo/query/acc.cgi?acc=GSE133713">https://www.ncbi.nlm.nih.gov/geo/query/acc.cgi?acc=GSE133713</a> |
| <a href="https://www.ncbi.nlm.nih.gov/geo/query/acc.cgi?acc=GSE153388">GSE153388</a> | van Baren N, Mercier M, de Streel G                       | Inflammatory transcript signatures and activated regulatory T lymphocytes in melanoma metastases                                                                                                 | 19 cutaneous metastases                               | Illumina HiSeq 2000                        | <a href="https://www.ncbi.nlm.nih.gov/geo/query/acc.cgi?acc=GSE153388">https://www.ncbi.nlm.nih.gov/geo/query/acc.cgi?acc=GSE153388</a> |
| <a href="https://www.ncbi.nlm.nih.gov/geo/query/acc.cgi?acc=GSE168204">GSE168204</a> | Gao Z, Tian T                                             | Pathway Signatures Derived from On-treatment Tumor Specimens Predict Response to Anti-PD1 Blockade in Metastatic Melanoma                                                                        | 27 melanoma samples                                   | Illumina HiSeq 2000 / Illumina NextSeq 500 | <a href="https://www.ncbi.nlm.nih.gov/geo/query/acc.cgi?acc=GSE168204">https://www.ncbi.nlm.nih.gov/geo/query/acc.cgi?acc=GSE168204</a> |
| <a href="https://www.ncbi.nlm.nih.gov/geo/query/acc.cgi?acc=GSE98394">GSE98394</a>   | Badal B, Solovyov A, Di Cecilia S, Chan JM, Chang L et al | Transcriptional dissection of melanoma identifies a high-risk subtype underlying TP53 family genes and epigenome deregulation                                                                    | 27 benign melanocytic lesions and 51 melanoma samples | Illumina HiSeq 2500                        | <a href="https://www.ncbi.nlm.nih.gov/geo/query/acc.cgi?acc=GSE98394">https://www.ncbi.nlm.nih.gov/geo/query/acc.cgi?acc=GSE98394</a>   |
| <a href="https://www.ncbi.nlm.nih.gov/geo/query/acc.cgi?acc=GSE100797">GSE100797</a> | Lauss M, Jönsson G                                        | Mutational and neoantigen load predict clinical benefit of adoptive T cell therapy in melanoma                                                                                                   | 25 melanoma samples                                   | Illumina HiSeq 2000                        | <a href="https://www.ncbi.nlm.nih.gov/geo/query/acc.cgi?acc=GSE100797">https://www.ncbi.nlm.nih.gov/geo/query/acc.cgi?acc=GSE100797</a> |
